# Supplementary material for: Toxicological Assessments of a Pandemic COVID-19 Vaccine—Demonstrating the Suitability of a Platform Approach for mRNA Vaccines
Source: MDPI journal article supplement (doi:10.3390/vaccines11020417), 2023-02-11

## Supplemental Tables

Table S1 Dose Volumes Administered

| Control or Test Article | Dose (µg RNA) | Total Dose Volume (µL) | Number of Sites x Dose Volume per Site |
|-------------------------|---------------|------------------------|----------------------------------------|
| PBS/Sucrose             | 0             | 200                    | 2 x 100 µL                             |
| BNT162b1                | 30            | 60                     | 1 x 60 µL                              |
| BNT162b1                | 100           | 200                    | 2 x 100 µL                             |
| BNT162b2 (V8)           | 100           | 200                    | 2 x 100 µL                             |
| Saline                  | 0             | 60                     | 1 x 60 µL                              |
| BNT162b2 (V9)           | 30            | 60                     | 1 x 60 µL                              |
| BNT162b3                | 30            | 60                     | 1 x 60 µL                              |

Table S2. Injection Site Draize Scoring

| Score                                                    | Scoring Criteria                                                           |
|----------------------------------------------------------|----------------------------------------------------------------------------|
| Edema                                                    |                                                                            |
| 0                                                        | No edema                                                                   |
| 1                                                        | Very slight edema (barely perceptible)                                     |
| 2                                                        | Slight edema (edges of area well defined by definite raising)              |
| 3                                                        | Moderate edema (raised approximately 1 mm)                                 |
| 4                                                        | Severe edema (raised more than 1 mm and extending beyond area of exposure) |
| Erythema                                                 |                                                                            |
| 0                                                        | No erythema                                                                |
| 1                                                        | Very slight erythema (barely perceptible)                                  |
| 2                                                        | Well-defined erythema                                                      |
| 3                                                        | Moderate to severe erythema                                                |
| 4                                                        | Severe erythema (beef redness)                                             |
| Induration or hardening <sup>a</sup>                     |                                                                            |
| 0                                                        | No induration/hardening                                                    |
| 1                                                        | Very slight induration/hardening (barely perceptible)                      |
| 2                                                        | Slight induration/hardening                                                |
| 3                                                        | Moderate induration/hardening                                              |
| 4                                                        | Severe induration/hardening                                                |
| a. Induration or hardening was only recorded in Study 1. |                                                                            |

Table S3. Hematology parameters

| Hematology Evaluation             |                                                 |
|-----------------------------------|-------------------------------------------------|
| Red Blood Cells (RBC)             | Mean Platelet Component (MPC); Study 1 only     |
| Red Cell Distribution Width (RDW) | Mean Platelet Volume (MPV)                      |
| Hemoglobin (HGB)                  | Mean Cell Hemoglobin (MCH)                      |
| Hematocrit (HCT)                  | White Blood Cells (WBC)                         |
| Mean Cell Volume (MCV)            | Mean Cell Hemoglobin Concentration (MCHC)       |
| Reticulocytes (RETIC)             | White Cell Differential                         |
|                                   | Platelets (PLT)                                 |
|                                   | Plateletcrit (PCT); Study 1 only                |
|                                   | Platelet Distribution Width (PDW); Study 1 only |

Table S4. Coagulation parameters

| Coagulation parameters                       |                  |
|----------------------------------------------|------------------|
| Activated Partial Thromboplastin Time (APTT) | Fibrinogen (FIB) |
| Prothrombin Time (PT)                        |                  |

Table S5. Clinical Chemistry Parameters

| Clinical Chemistry Evaluation    |                                           |
|----------------------------------|-------------------------------------------|
| Alanine Aminotransferase (ALT)   | Cholesterol (CHOL)                        |
| Albumin (ALB)                    | Creatinine (CREA)                         |
| Aspartate Aminotransferase (AST) | Creatine Kinase (CK); Study 1 only        |
| Albumin/Globulin Ratio (AG)      | Gamma Glutamyltransferase (GGT)           |
| Alkaline Phosphatase (ALP)       | Globulin (GLOB)                           |
| Bilirubin, Total (TBIL)          | Glucose (GLUC)                            |
| Blood Urea Nitrogen (BUN)        | Lactate Dehydrogenase (LDH); Study 1 only |
| Calcium (CA)                     | Phosphorus (PHOS)                         |
| Chloride (CL)                    | Potassium (K)                             |
|                                  | Sodium (NA)                               |
|                                  | Triglyceride (TRIG)                       |
|                                  | Total Protein (TP)                        |

Table S6. Urinalysis Parameters

| Urinalysis                  |                        |
|-----------------------------|------------------------|
| Bilirubin                   | Nitrites; Study 1 only |
| Blood/Hemoglobin            | Ketones                |
| Clarity                     | pH                     |
| Color; Study 2 only         | Protein                |
| Glucose                     | Specific Gravity       |
| Urobilinogen (Study 1 only) | Volume                 |
|                             | Microscopic evaluation |

Table S7. Tissue collection and organ weights

| Tissue List                                                                                                                                                                                                                                                                                                                                                                                                                                                                                                                                                                                                                                   |                                                                                                                                                                                                                                                                                                                                                                                                                                                                                                          |
|-----------------------------------------------------------------------------------------------------------------------------------------------------------------------------------------------------------------------------------------------------------------------------------------------------------------------------------------------------------------------------------------------------------------------------------------------------------------------------------------------------------------------------------------------------------------------------------------------------------------------------------------------|----------------------------------------------------------------------------------------------------------------------------------------------------------------------------------------------------------------------------------------------------------------------------------------------------------------------------------------------------------------------------------------------------------------------------------------------------------------------------------------------------------|
| Aorta<br>Bone Marrow, Sternum<br>Bone, Sternum or Femur<br><b>Brain</b><br>Cervix<br><b>Epididymis</b><br>Esophagus<br>Eye<br><b>Gland, Adrenal</b><br>Gland, Harderian<br>Gland, Lacrimal (Extraorbital)<br>Gland, Mammary<br>Gland, Parathyroid<br><b>Gland, Pituitary</b><br><b>Gland, Prostate</b><br>Gland, Salivary<br>Gland, Seminal Vesicle<br><b>Gland, Thyroid</b><br>Gut-Associated Lymphoid Tissue<br><b>Heart</b><br>Joint (knee)<br><b>Kidney</b><br>Large Intestine, Cecum<br>Large Intestine, Colon<br>Large Intestine, Rectum (Study 1 only)<br>Larynx<br><b>Liver</b><br><b>Lung</b><br>Lymph Node, Cervical (Study 1 only) | Lymph Node, Draining (Iliac)<br><b>Lymph Node, Inguinal</b><br><b>Lymph Node, Mesenteric</b><br>Macroscopic Findings<br>Muscle, Skeletal<br>Nerve, Optic<br>Nerve, Peripheral<br><b>Ovary</b><br>Oviduct<br>Pancreas<br>Seminal vesicle<br>Site, Injection<br>Skin<br>Small Intestine, Duodenum<br>Small Intestine, Ileum<br>Small Intestine, Jejunum<br>Spinal Cord<br><b>Spleen</b><br>Stomach<br><b>Testis</b><br><b>Thymus</b><br>Tongue<br>Trachea<br>Ureter<br>Urinary Bladder<br>Uterus<br>Vagina |

Bolded organs represent the organs for which organ weights were collected in Study 1 and/or Study 2. Larynx was collected, but not examined.

Table S8: Test article-related clinical pathology findings (Ratio Relative to Control Mean)

| Study        |                    | Study 1  | Study 1  | Study 1       | Study 1  | Study 1  | Study 1       | Study 2       | Study 2  | Study 2       | Study 2  |
|--------------|--------------------|----------|----------|---------------|----------|----------|---------------|---------------|----------|---------------|----------|
| Sex          |                    | Male     | Male     | Male          | Female   | Female   | Female        | Male          | Male     | Female        | Female   |
| Test article |                    | BNT162b1 | BNT162b1 | BNT162b2 (V8) | BNT162b1 | BNT162b1 | BNT162b2 (V8) | BNT162b2 (V9) | BNT162b3 | BNT162b2 (V9) | BNT162b3 |
| Parameter    | Dose (µg/dose day) | 30       | 100      | 100           | 30       | 100      | 100           | 30            | 30       | 30            | 30       |
| ALB          | Day 4              | 0.96x    | 0.93x    | 0.91x         | 0.92x    | 0.89x    | 0.87x         | 0.93x         | 0.92x    | 0.86x         | 0.90x    |
| ALB          | Day 17             | 0.96x    | 0.96x    | 0.94x         | 0.90x    | 0.89x    | 0.89x         | -             | -        | 0.85x         | 0.86x    |
| GLOB         | Day 4              | 1.16x    | 1.09x    | 1.07x         | 1.10x    | 1.08x    | 1.04x         | -             | -        |               | 1.05x    |
| GLOB         | Day 17             | 1.19x    | 1.26x    | 1.23x         | 1.18x    | 1.14x    | 1.18x         | 1.10x         | 1.07x    | 1.04x         | -        |
| GLOB         | Day 38*            | -        | -        | -             | -        | -        | -             | 1.08x         | -        | 1.06x         | 1.07x    |
| AG           | Day 4              | 0.83x    | 0.85x    | 0.85x         | 0.84x    | 0.83x    | 0.84x         | 0.90x         | 0.90x    | 0.86x         | 0.85x    |
| AG           | Day 17             | 0.81x    | 0.76x    | 0.76x         | 0.76x    | 0.78x    | 0.76x         | 0.89x         | 0.89x    | 0.82x         | 0.85x    |
| AG           | Day 38             | -        | -        | -             | -        | -        | -             | -             | -        | 0.91x         | -        |
| A2M          | Day 4              | 36x      | 54x      | 54x           | 18x      | 91x      | 75x           | 20x           | 34x      | 3.3x          | 4.2x     |
| A2M          | Day 17             | 44x      | 279x     | 217x          | 45x      | 168x     | 121x          | 71x           | 128x     | 16x           | 18x      |
| A1AGP        | Day 4              | 5.9x     | 7.0x     | 6.9x          | 4.7x     | 5.6x     | 5.6x          | 9.4x          | 13x      | 8.0x          | 7.0x     |
| A1AGP        | Day 17             | 8.7x     | 19x      | 21x           | 8.9x     | 19x      | 16x           | 39x           | 42x      | 16x           | 17x      |
| FIB          | Day 17             | 2.6x     | 2.9x     | 3.1x          | 2.5x     | 2.6x     | 2.6x          | 2.4x          | 2.4x     | 2.5x          | 2.6x     |
| HGB          | Day 4              | -        | -        | -             | -        | -        | -             | 0.94x         | 0.93x    | 0.93x         | 0.93x    |
| HGB          | Day 17             | -        | 0.89x    | 0.91x         | 0.90x    | 0.86x    | 0.87x         | 0.91x         | 0.93x    | 0.90x         | 0.89x    |
| RDW          | Day 17             | -        | -        | -             | -        | -        | -             | 1.21x         | 1.18x    | 1.18x         | 1.18x    |
| RDW          | Day 38             | -        | -        | -             | -        | -        | -             | 1.13x         | 1.12x    | 1.21x         | 1.23x    |
| RETIC        | Day 4              | 0.56x    | 0.37x    | 0.28x         | -        | -        | 0.52x         | 0.27x         | 0.27x    | 0.43x         | 0.44x    |
| RETIC        | Day 17             | -        | -        | -             | -        | -        | -             | -             | -        | 1.31x         | 1.20x    |
| PLT          | Day 17             | -        | 0.75x    | 0.71x         | -        | 0.66x    | 0.66x         | -             | -        | -             | -        |
| WBC          | Day 4              | -        | -        | -             | -        | -        | -             | 1.41x         | 1.28x    | 1.30x         | 1.43x    |
| WBC          | Day 17             | -        | 1.82x    | 2.2x          | 1.79x    | 2.0x     | 2.1x          | 2.3x          | 2.2x     | 2.6x          | 3.0x     |
| NEUT         | Day 4              | -        | -        | -             | -        | -        | -             | 2.3x          | 2.0x     | 2.5x          | 3.1x     |
| NEUT         | Day 17             | 4.0x     | 5.5x     | 7.1x          | 5.9x     | 7.4x     | 7.8x          | 6.6x          | 6.5x     | 6.0x          | 7.0x     |
| MONO         | Day 4              | -        | -        | -             | -        | -        | -             | 1.83x         | 1.96x    | 1.89x         | 2.5x     |

|      |        |      |       |      |      |      |      |       |      |       |      |
|------|--------|------|-------|------|------|------|------|-------|------|-------|------|
| MONO | Day 17 | 2.0x | 1.78x | -    | 2.3x | 2.1x | -    | 3.3x  | 3.6x | 2.8x  | 3.1x |
| EO   | Day 4  | -    | -     | -    | -    | -    | -    | -     | -    | -     | 2.2x |
| EO   | Day 17 | 2.1x | 3.3x  | 5.2x | 3.3x | 5.4x | 6.1x | 2.5x  | 2.2x | 3.2x  | 3.3x |
| BASO | Day 4  | -    | -     | 2.5x | -    | -    | -    | 1.88x | 2.3x | 1.89x | 2.7x |
| BASO | Day 17 | 2.0x | 2.1x  | 2.5x | 2.2x | 2.3x | 2.1x | 5.7x  | 6.3x | 8.0x  | 10x  |
| LUC  | Day 4  | -    | -     | 4.0x | -    | 3.5x | 4.2x | 4.1x  | 4.0x | 4.2x  | 4.4x |
| LUC  | Day 17 | 2.7x | 6.8x  | 7.9x | 5.6x | 8.1x | 6.9x | 8.0x  | 12x  | 13x   | 19x  |

- : no test article-related finding

\* Day 38 was only included when a study group displayed a statistical difference as compared to control.

Supplementary Figure S1 Body weight in male (M) and female (F) Wistar Han rats immunized intramuscularly (IM) with a) BNT162b1 (30 µg or 100 µg), BNT162b2 V8 (100 µg) or buffer control; b) BNT162b2 V9 (30 µg), BNT162b3 (30 µg), or saline control.

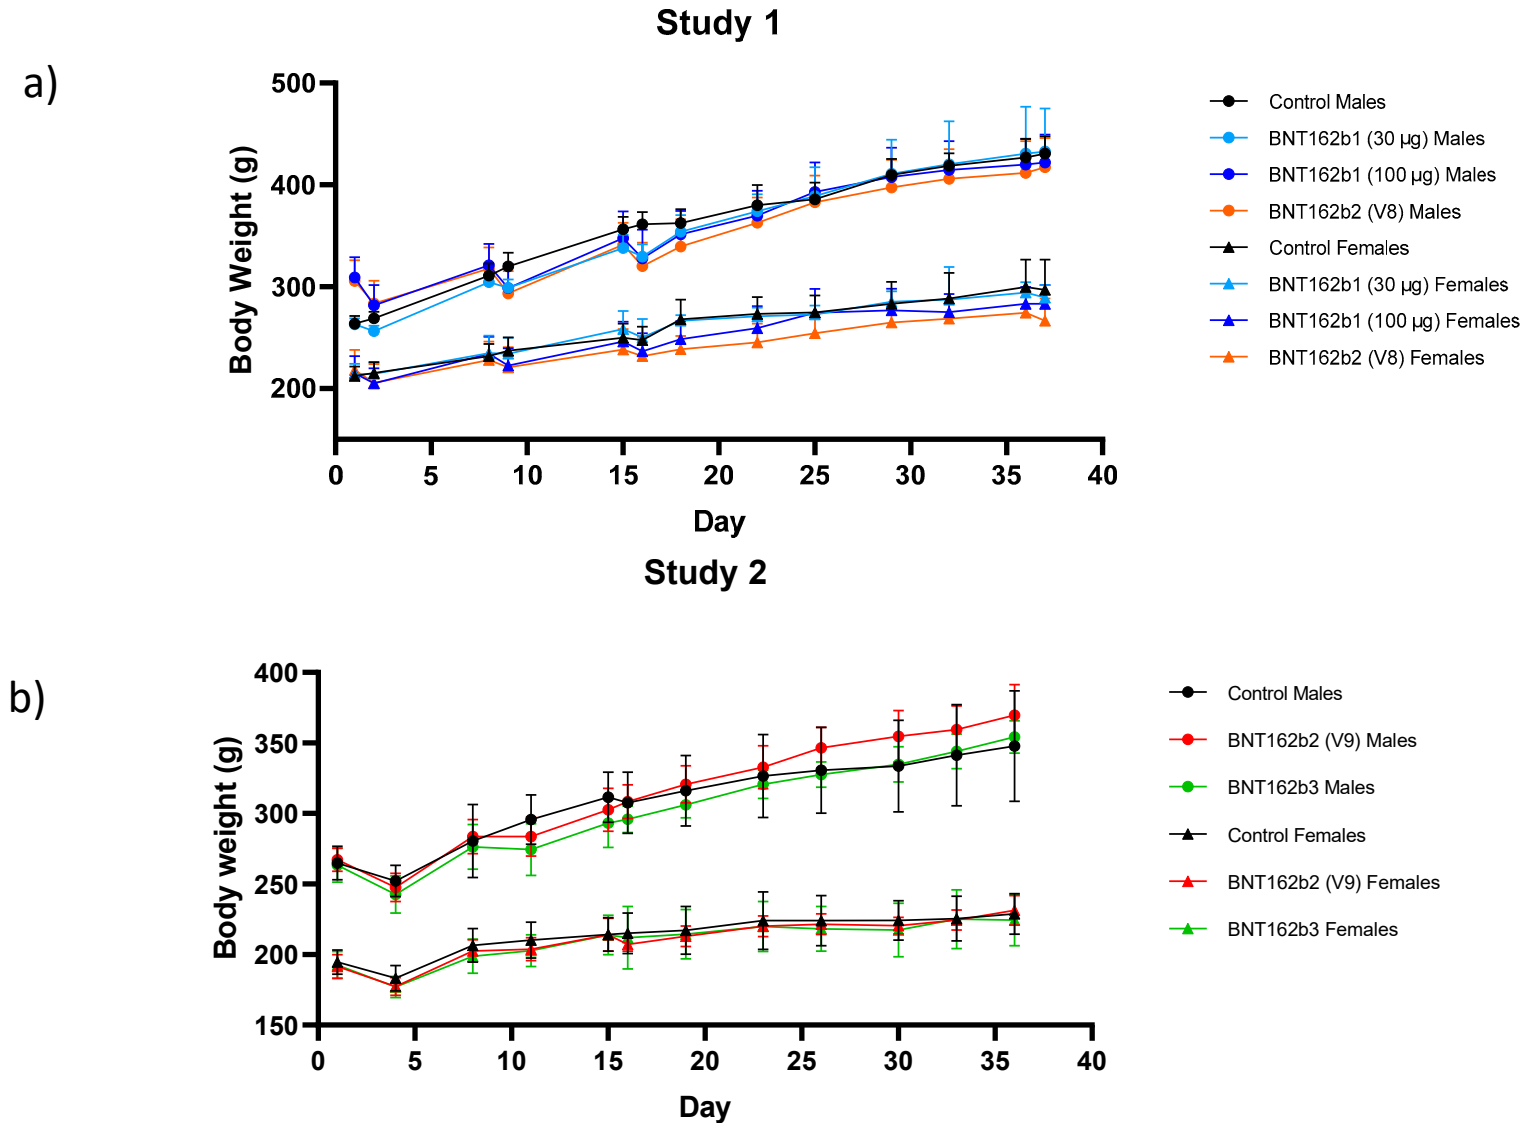

Supplement: s1 [file s1]
